# Supplementary material
Source: MDPI journal article supplement (https://www.mdpi.com/2073-4395/14/2/281)
Supplement: s1 [file s1]

Archive with 3 entries (3 files):
- Figure S1.pdf
- Figure S2.pdf
- Table S1.pdf
