# Supplementary material
Source: MDPI journal article supplement (https://www.mdpi.com/2073-4395/14/2/281)
Supplement: s1 [file s1 › Figure S2.pdf]

>full length genomic sequence (5'-3')

GAGTGAGGAGTCCCAAATTCTGCGATCGATATTTTTCATTAATCTTTGGTTTGTTACTTT  
TTAATATGCATTTTGTACGATCTATGATAAATGGTATTTAAATTCATAGAAGTTACCATTTT  
TGTTTTAATTAGGTTTATTCTTAATACAAAATGACAAAAAATCCCATCTTACGACAGTGA  
AATGACCTCTGGGCAATAATTTTATCCGTGGTTGTATaAGATCAAGTACGATAAGAATGT  
TAATATAACAATTTCTTAATCTTTGCCACTTAAATATTATAGTGATATTTTTTTTCGAAATCA  
TGGACGTGTAAAAGGAGATCGAGTTAATTATTCAGCGAGATATATAAAGTCTTGGATATT  
TTTGTCTTGATGTCACTAAAGGTTTCTAGAATCCTGTAAGTTAATGGACACCGATTTTG  
CGAGTTTATTGATATATAAAAGGTCTTGTTTCATATGGGTTGACTTGAAATCATGAAGTTA  
ACATGAGAATGATATATGCTGACAAACAAAACATAAGAATGAGGTTTACCGGGAAAAA  
GAAGTAAAAAAGAAATTAAGAATGAATCTCACTGGTCACATGAAACCGCATGAGTTT  
GTTAACGGTAGAAGAAAAGAATGTAAAAGATGATAGTTATAAGTAGGTATAAGAACAG  
CAGAAAAGGATAAATACGCTTTCCTATAAGTTAGATGGTAACACACCGTATTGGTTGA  
ATCGCTTTGTGTTCCGATTTGCTTTCCTATATGAAAGATATATGCTTTGATCGACAAAAT  
ATTTTCTGCACGTTGTATCATTTTTTATCTTTTCGATCTTAAAATCGTGTGTATGGCTTAAG  
CTACGCTCAGGCCCGGCCATGAAAACTCTAAGAAATAAGACGTATTGTATTTTAAAGC  
TACGTTCTACACTAATGATTAATGAACACATCAAGACTAGAACGTCAATTTCTATATGT  
AATAAGTCGCTAACTGCAGAAAATTTTAAGTCTATGTACTGAAATCTAAAAATAAACTA  
TTTGAAATCTCTATATACATAAGATATATTTCAAAAAAAAAAAATCTCTATATACATTCAGC  
ACGTGAAATGAGAAAGAAAAAGGACAATGATTGGGAAAAGGGATCAAATATGTACTTT  
AAAAACACTTCTATTACATATTTTTGATATATTTATACACTGAAAATTTTAGTTAAATTTA  
GACATTCGTGATATAAATATGAGTATGATAAGTGATAACTAAGACATTCGTGAAATAAGT  
CACATTAGTTAACCTGTAATACTCGTTTCGTTTTATTGTAAATTGGACCATATTGTCAATC  
ATTCTAATAAATCATATTAATTAATCCAATTAGTAAGTTTTAAACTACATTAGATATATTG  
CTATTGAAATCTATTGATATTACATTTAAAAAATAAACTTGGACTATGTGAGGTCAAT  
CCTGTAGTCCAACTAAAAACACAGTCAACATATGATGGTCACATTTCTTTAAATGGTT  
CCGATTATGACCATCATATTTATTTTCAGTAAAAATTTTACCATAAAATAAACCTTAAAATC  
AATGACTCATTAGTTCTCACTAATTTATTTTCTACTATGAAAGATACATAATTGGCAGTA  
GATGACTATTTGTTCTTTAGATTTGTCCGAATCTTACAACCATGATAGATAGAGAAAGCT  
TGGCCCCTAACATCGATCTCTCTCCAGCTTACAAAAGCCCTATAAATAGATGTCTTGTT  
GCCTTTGGTATCAAACACCACTACAAATATCTCTTTCCCTAAGCTCACTTAAAAACC  
CACAGTTGTTTAGAAAGAGAAAGAAACCTTTACAAAATAAAAAATGGAGAATATGGGAA  
CTAGAGTGATAGAGCCATTGATAGTGGGAAGAGTGGTCGGAGATGTTCTTGATAATTC  
ACTCCAACAATTAATAATGAACGTGAGTTACAACAAGAAGCAAGTCTCCAATGGCCATG  
AGTTTTTGCCTTTAGCTGTCTCCTCCAAGCCTAGGGTTGAGATACATGATGGTGATCTC  
AGATCTTTCTTACCCTGGTATGTAAACATATGTTTAAATTATTTTAAATTATCAATAAT  
GATAGGATTGCTGGTTGTATAGTTCTAATATCTTGTGCCAAAACATATCACTCAGTATCTT  
TTCATCTCATAAGTCATTTATTTTCTGACTCCATGATGAAAAAGAGAGTCTGATCAATAA  
TCTTATATATTGTACCTTTTAGTAAAATAGTATGATGCTGTTATGTACTTTGATCATTTTTT  
TTTCTTTCTTCATTGAtGGTAATaGCAACTGAATTGCAAAACAGGTGATGACAGACCCT  
GATGTTCCAAATCCTAGTGACCCCTTTCTAAAAGAACGCCTGCATTGGTACGTTCAAAT  
TCTTGCCGTTTCATTTTCAGCCCATATCTCGGTCATATGTATTTCAATTGAATTATTAATAA  
CCATCTCTACATTATTTTTTATAAACTTGAGTTGAGTTGGTCATAGTCTTCCATCACAGC  
ACTAAATAATTGCATGTAAATATTTCAACAGGCTCGTCATGAACATCCCCGGCACAACA

(To be continued)

GATGCTACATTTGGTATGGGCTCGTCATGAATTTTGTGGTTTAAAATACTTACAATAAAA  
 GATATATCCAAATAAGTATTAATAAATAATTGAACTGAAATTGTAGGAAAAGAGGTGGTG  
 AGCTATGAGCTGCCAAAGCCAAACATAGGGATACACAGGTACGTTTTTGTTCGTTCAG  
 GCAGAAGCAAAGACGTGTTAAGTTCCCAAGCAATATTATTTGAGGGATCAGTTC AAC  
 ACTCGCGAATTTGCGATCGAGAATGATCTTGGTCTCCCTGTCGCGGCTGTCTTCTTCAA  
 CGCTCAGAGAGAAACCGCATCTCGCAGACGTTAATTACGTCTATGTCCATCAAATGCAT  
 AAAAAATGATAACATGTTTATCTCTGTTCTTAATTATCCATGTTTATTTCTGTTCTAAAT  
 CCCGTATTTTAAATAAATAATTGTTTTCGTATATATATTTAATCTCATTATAGGAGATTAAAT  
 TCCCGTATTTTATTTCTGTTCTAAACCTTATATATGTCTCGATAGGTCAAATCGAGTTAA  
 TCTCATTATATGATATATGATACATGGAAAACAGAAAAACAAAATTGTAAACAAACAAA  
 AATAGTTCTGGTCAAAGTGACAAGACCTTGGTGACCACCTATAATAGGACGCTCCTTCT  
 CACTCGGCGATCCGAATATTATCAGTTATCATTATGTCTAGCTATCTTTCTCACATGTTCA  
 GTGTTTGGTATTGTATAGAAATACGTTGCGGCTCCCTAAATGCTAGTACACCAAACCTGT  
 GTATCTTTTGAGAAAATGTAAATATATAGTGAATAAATCTAGCTAGTGTTCTACTACAATT  
 GCTTTTCTTTGAGTATGA

**Figure S2:** The 3437 bp genomic fragment incorporating the BraA10.TFL1 gene. The yellow background shows the 1842 bp of the gene upstream, the grey background shows the 1066 bp of the gene coding region, and the green background shows the 529 bp of the gene downstream.
