# Supplementary material
Source: MDPI journal article supplement (https://www.mdpi.com/2073-4395/14/2/281)
Supplement: s1 [file s1 › Table S1.pdf]

Table S1 The primer sequences used in this study

| Primer name    | Sequence 5'-3'                                 | Function                                                                                                                                                                                      |
|----------------|------------------------------------------------|-----------------------------------------------------------------------------------------------------------------------------------------------------------------------------------------------|
| Bra.TFL1-orf-F | CCCCTAACATCGATCTCTCT                           | Cloning the gDNA/cDNA of <i>BraA10.TFL1</i> and <i>BraA10.tfl1</i>                                                                                                                            |
| Bra.TFL1-orf-R | CGATTTGACCTATCGAGACA                           |                                                                                                                                                                                               |
| M13F           | CGCCAGGGTTTTCCCAGTCACGAC                       | Identifying positive transgenic plants                                                                                                                                                        |
| M13R           | AGCGGATAACAATTCACACAGGA                        |                                                                                                                                                                                               |
| CEBra.TFL1-F   | tatgaccatgattacGAATTCGAGTGAGGAGTCCCAA<br>ATTCT | Cloning the genomic DNA fragment. This is recombinant primers; the underlined sequences are the restriction sites of EcoRI and PstI, and the lowercase letters are homologous 15 bp sequences |
| CPBra.TFL1-R   | gccaaagcttgcctgcCTGCAGTGTGTGCCGGGGATG<br>TTCA  |                                                                                                                                                                                               |
| PT- Bra.TFL1-F | GGCACCCCAGGCTTTACACT                           | Identifying positive transgenic plants                                                                                                                                                        |
| PT- Bra.TFL1-R | AAACTCGCAAAATCGGTGTCCA                         |                                                                                                                                                                                               |
| qRT-braA10-1F  | TGAGTTTTTGCCTTAGCTG                            | Quantitative real-time PCR                                                                                                                                                                    |
| qRT-braA10-2R  | ACCACCTCTTTTCCAAATGT                           |                                                                                                                                                                                               |
| Actin-F        | CTGTCCCAATCTACGAGGGTTTC                        | Quantitative real-time PCR; reference gene                                                                                                                                                    |
| Actin-R        | CTTACAATTTCCCGCTCTGCTGT                        |                                                                                                                                                                                               |
