# Supplementary material
Source: MDPI journal article supplement (https://www.mdpi.com/2073-4395/14/2/281)

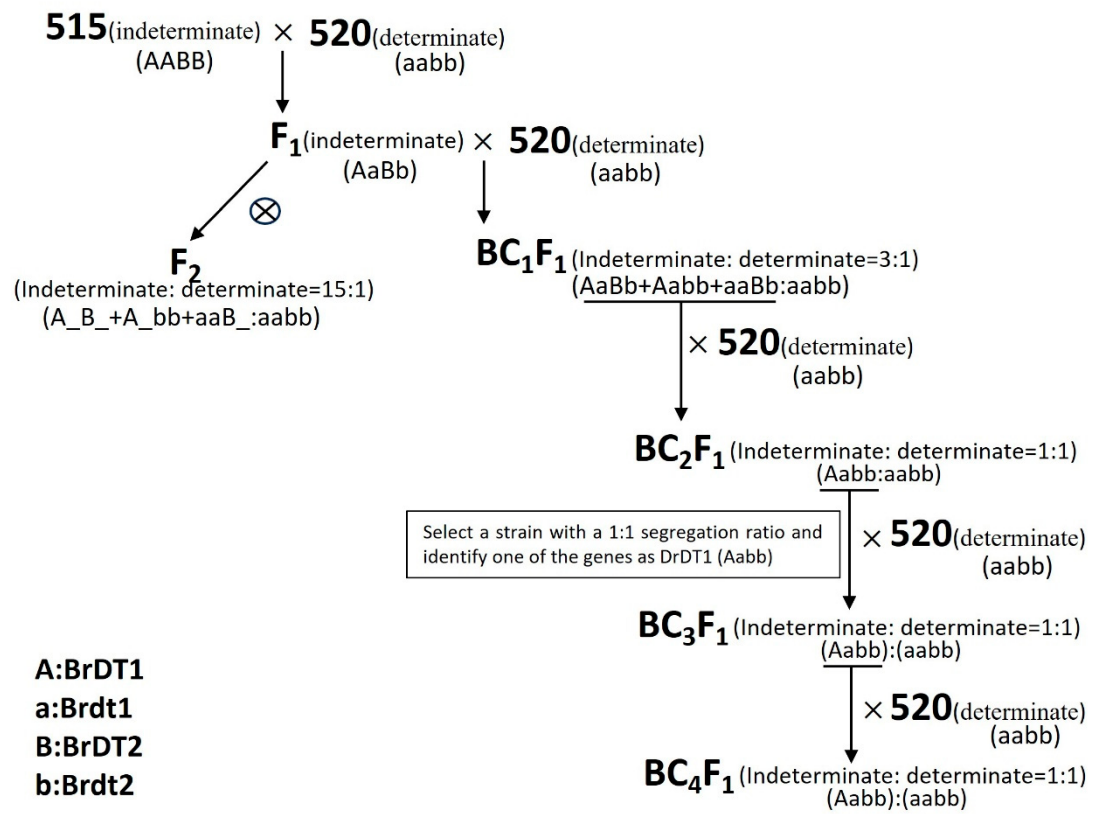

Figure S1: population construction

Supplement: s1 [file s1 › Figure S1.pdf]
